# Supplementary material
Source: PubMed Central journal article supplement (PMC6646198)
Supplement: ao8b01447_si_001.pdf [file ao8b01447_si_001.pdf]

**Supporting Information:**

**Treatment of Coffee Husk with Ammonium-Based Ionic Liquids:  
Lignin Extraction, Degradation, and Characterization**

Leta Deressa Tolesa<sup>a</sup>, Bhupender S. Gupta<sup>a</sup>, and Ming-Jer Lee<sup>a\*</sup>

<sup>a</sup>Department of Chemical Engineering, National Taiwan University of Science and Technology, 43 Keelung Road, Section 4, Taipei 106-07, Taiwan

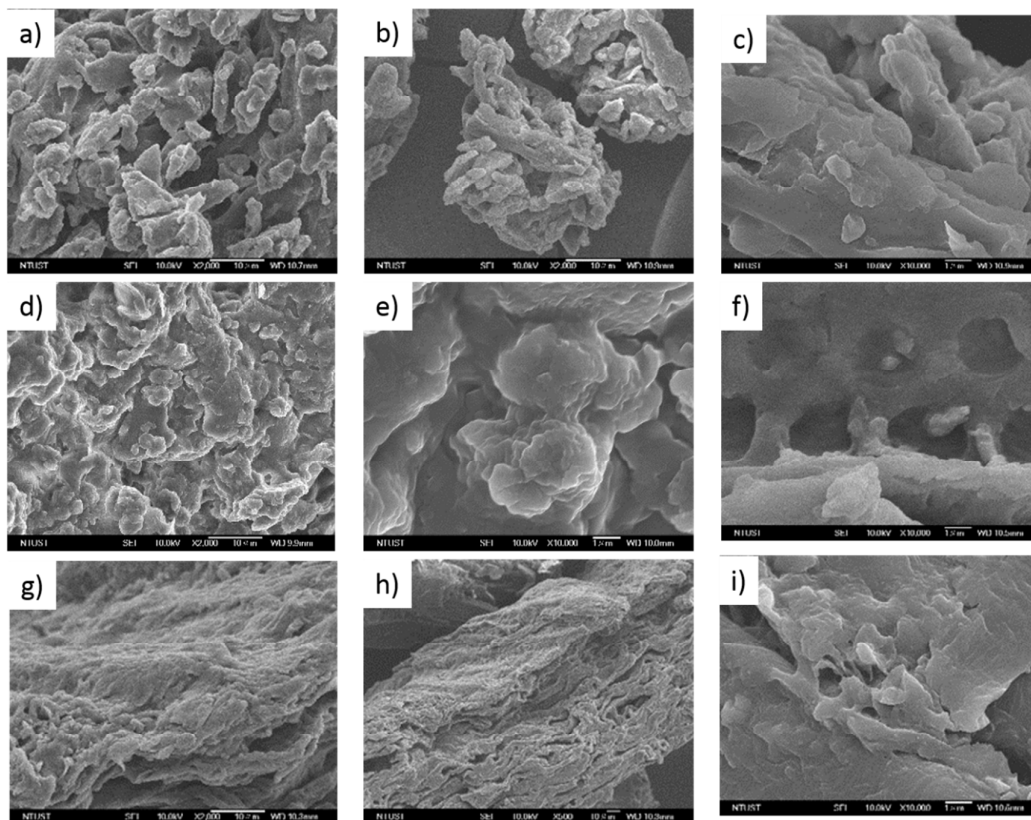

**Figure S1** Field emission-scanning electron microscope micrographs for coffee husk (a-c), [DIPEA][Ac] extracted lignin (d-f) and carbohydrates enriched materials (g-i) (h:  $\times 500$ ; a, b, d, g:  $\times 2,000$ ; c, e, f, i:  $\times 10,000$ ).

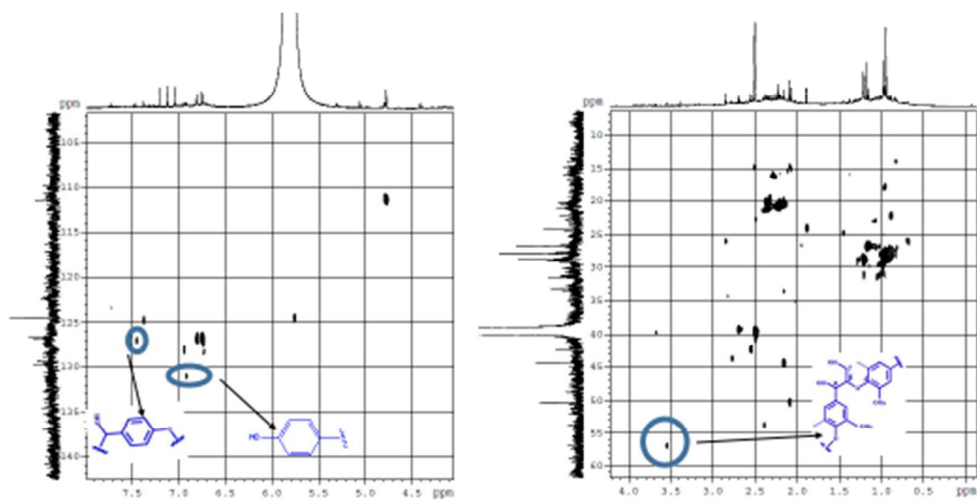

**Figure S2** HSQC NMR spectrum of lignin fraction extracted by IL at 120 °C after 4 h treatment.
